# Supplementary material for: Plant defense resistance in natural enemies of a specialist insect herbivore
Source: PubMed Central journal article supplement — Proc Natl Acad Sci U S A. 2019 Oct 28;116(46):23174–81. doi: 10.1073/pnas.1912599116 (PMC6859362; doi:10.1073/pnas.1912599116), 2019-10-28
Supplement: pnas.1912599116.sapp.pdf [file pnas.1912599116.sapp.pdf]

Supplementary Information for

**Plant defense resistance in natural enemies of a specialist insect herbivore**

Xi Zhang, Cong van Doan, Carla C.M. Arce, Lingfei Hu, Sandra Gruenig, Christian Parisod, Bruce E. Hibbard, Maxime Hervé, Christelle A.M. Robert\*, Ricardo A.R. Machado\*, Matthias Erb\*

\*Corresponding authors:

Matthias Erb

Email: [matthias.erb@ips.unibe.ch](mailto:matthias.erb@ips.unibe.ch)

Ricardo A.R. Machado

Email: [ricardo.machado@ips.unibe.ch](mailto:ricardo.machado@ips.unibe.ch)

Christelle A.M. Robert

Email: [christelle.robert@ips.unibe.ch](mailto:christelle.robert@ips.unibe.ch)

**This PDF file includes:**

Figures: S1 to S9

Tables: S1 to S2

SI References

**Other supplementary materials for this manuscript include the following:**

Dataset S1

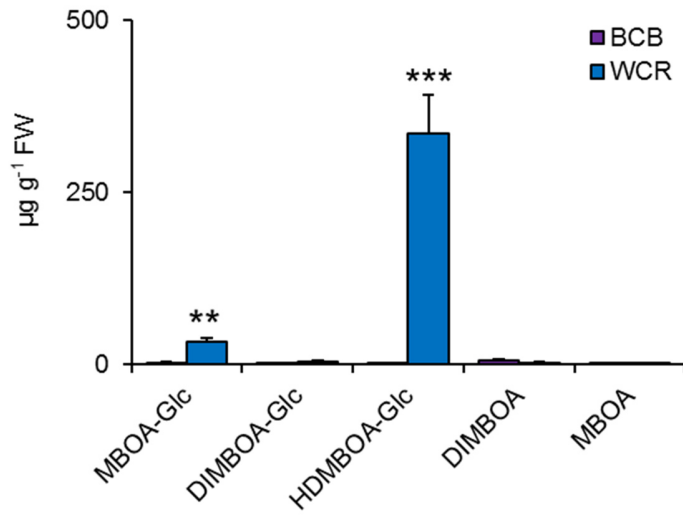

**Fig. S1. Quantification of plant-derived benzoxazinoids in different nematode hosts.** Absolute quantities of benzoxazinoids extracted from larvae of the western corn rootworm (WCR; blue) and the banded cucumber beetle (BCB; purple) are shown. Asterisks indicate significant differences between herbivore species (\*\* $P < 0.01$ ; \*\*\*  $P < 0.001$ ).

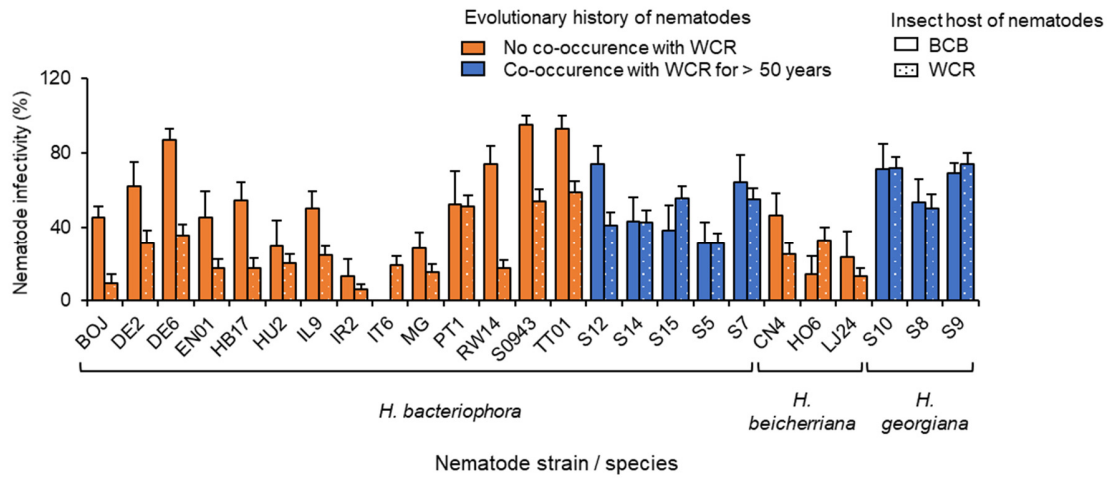

**Fig. S2. Infectivity of individual nematode strains towards different herbivores.** Infectivity of individual nematode strains from the primary range of the western corn rootworm (blue) and other parts of the world (orange) towards the western corn rootworm (WCR; plain filled bars) and the banded cucumber beetle (BCB; dotted bars) is shown.

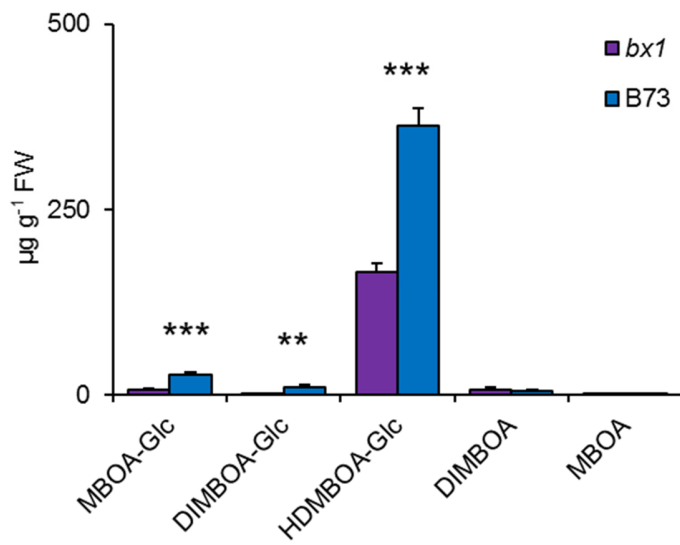

**Fig. S3. Quantification of benzoxazinoids in western corn rootworm larvae fed on wild type and *bx1* mutant maize roots.** Absolute quantities of benzoxazinoids extracted from larvae of the western corn rootworm fed on *bx1* mutant (*bx1*; purple) and wild type (WT; blue) maize roots are shown. Asterisks indicate significant differences between plant genotypes (\*\* $P < 0.01$ ; \*\*\* $P < 0.001$ ).

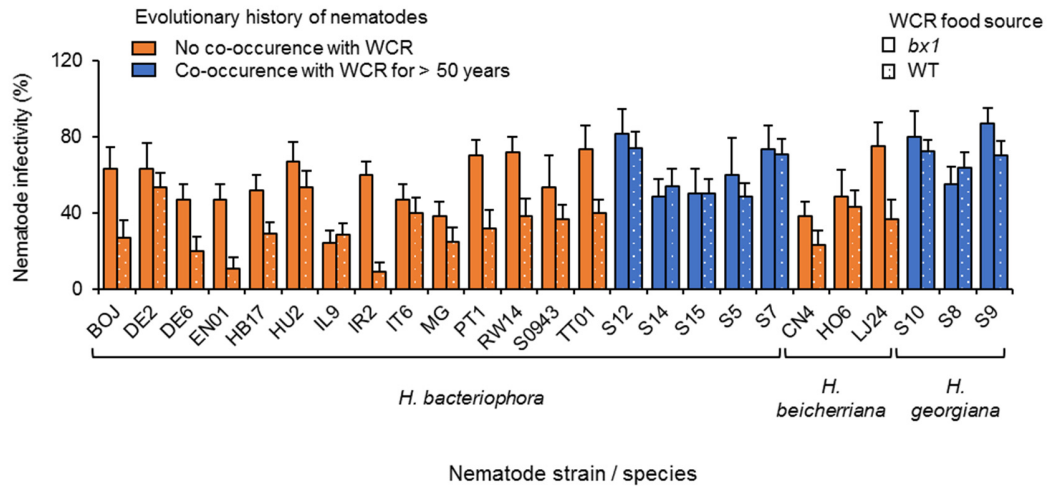

**Fig. S4. Impact of herbivore-sequestered benzoxazinoids on the infectivity of individual nematode strains.** Infectivity of individual nematode strains from the primary range of the western corn rootworm (WCR; blue) and other parts of the world (orange) towards WCR larvae fed on *bx1* mutant (*bx1*; plain filled bars) and wild type (WT; dotted bars) maize roots is shown.

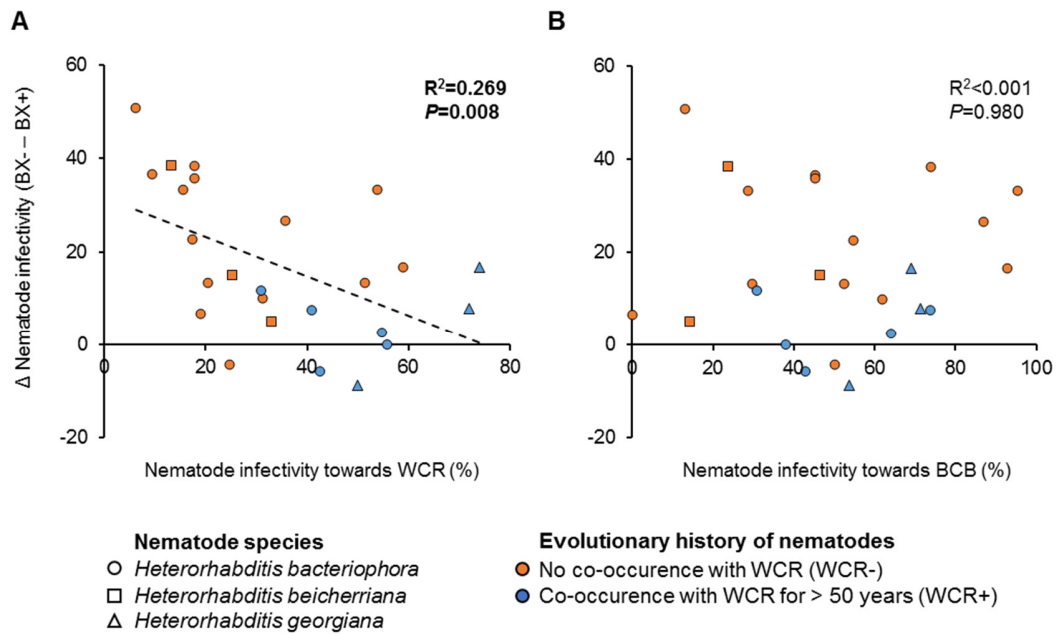

**Fig. S5. Correlations between benzoxazinoid-dependent infectivity and infectivity towards different herbivores.** Correlations are shown between the capacity of the different nematode strains to infect western corn rootworm (WCR) and banded cucumber beetle (BCB) larvae (Fig. S2) and their capacity to withstand sequestered benzoxazinoids (Fig. S4). Benzoxazinoid resistance is calculated by taking the difference in infectivity of the individual strains between *bx1* mutant (BX-) and wild type (BX+) maize root fed western corn rootworm larvae. Positive values correspond to higher infectiveness towards *bx1* mutant fed larvae. Significant correlations are indicated with dashed lines.  $R^2$  and  $P$ -values from Pearson product-moment correlations are provided.

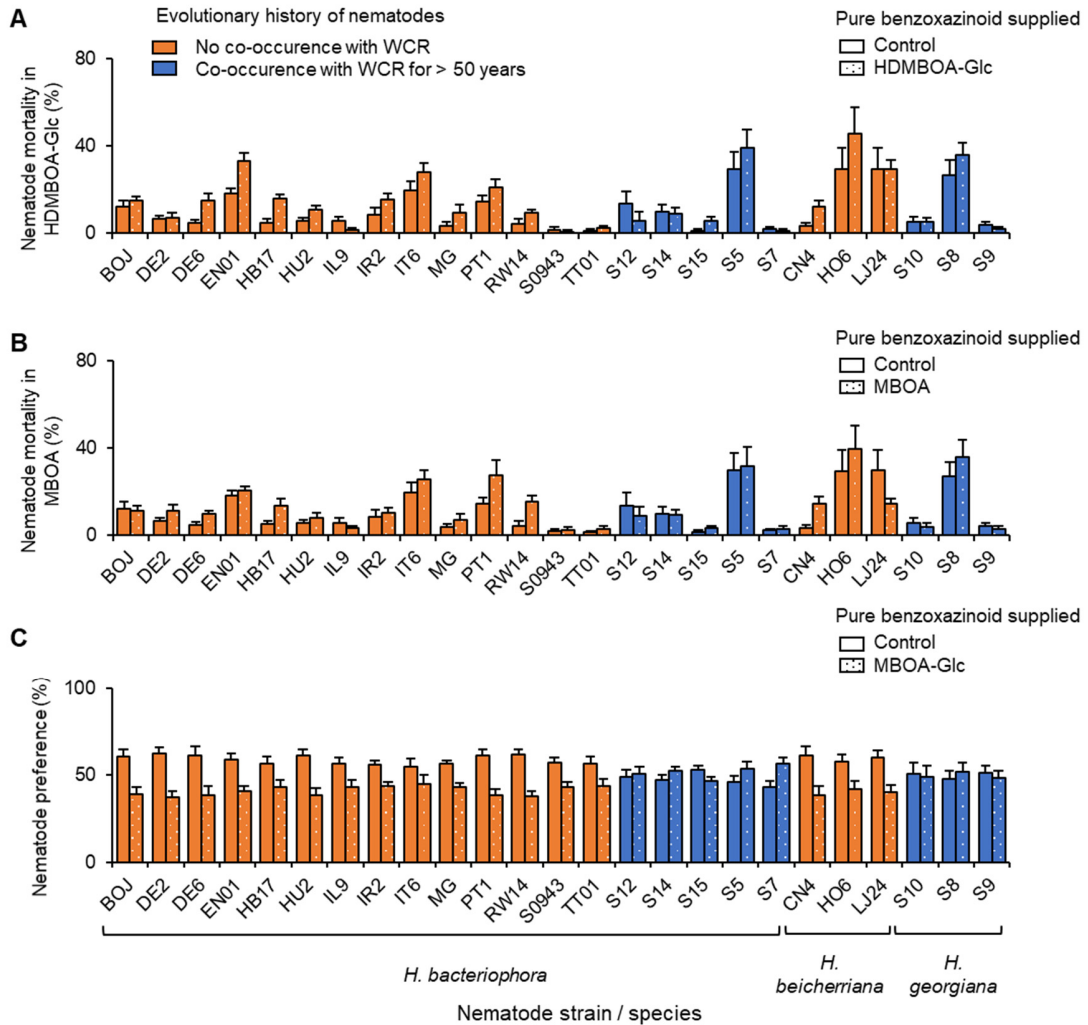

**Fig. S6. Impact of pure benzoxazinoids on individual nematode strains.** (A) Mortality of individual nematode strains from the primary range of the western corn rootworm (WCR; blue) and other parts of the world (orange) treated with water (plain filled bars) or 150  $\mu\text{g}/\text{mL}$  HDMBOA-Glc (dotted bars) is shown. (B) Mortality of nematodes treated with water or 25  $\mu\text{g}/\text{mL}$  MBOA. (C) Preference of nematodes for water or 3  $\mu\text{g}/\text{mL}$  MBOA-Glc.

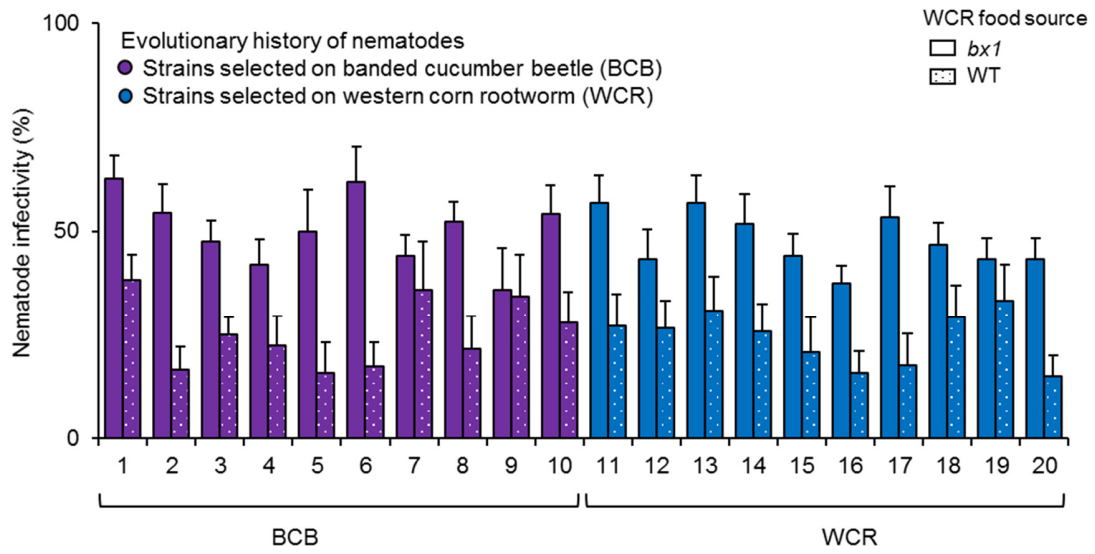

Nematode population number and insect selection host

**Fig. S7. Impact of herbivore-sequestered benzoxazinoids on nematode infectivity after one generation of artificial selection on different herbivores.** Infectivity of individual nematode strains selected on the western corn rootworm (WCR; blue) or the banded cucumber beetle (BCB; purple) towards WCR larvae fed on *bx1* mutant (*bx1*; plain filled bars) and wild type (WT; dotted bars) maize roots is shown.



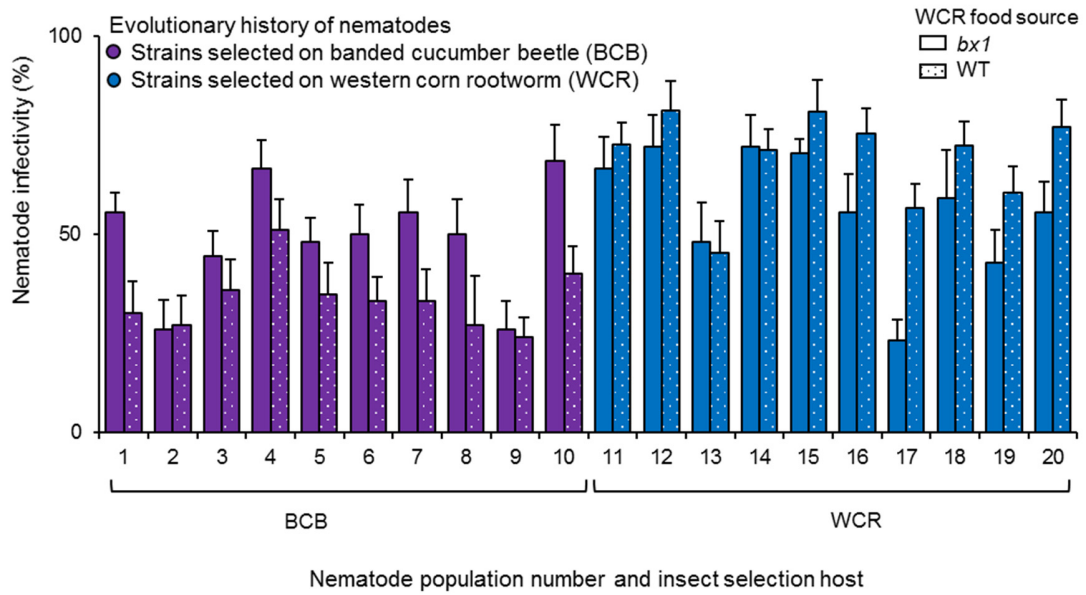

**Fig. S8. Impact of herbivore-sequestered benzoxazinoids on nematode infectivity after five generations of artificial selection on different herbivores.** Infectivity of individual nematode strains selected on the western corn rootworm (WCR; blue) or the banded cucumber beetle (BCB; purple) towards WCR larvae fed on *bx1* mutant (*bx1*; plain filled bars) and wild type (WT; dotted bars) maize roots is shown.

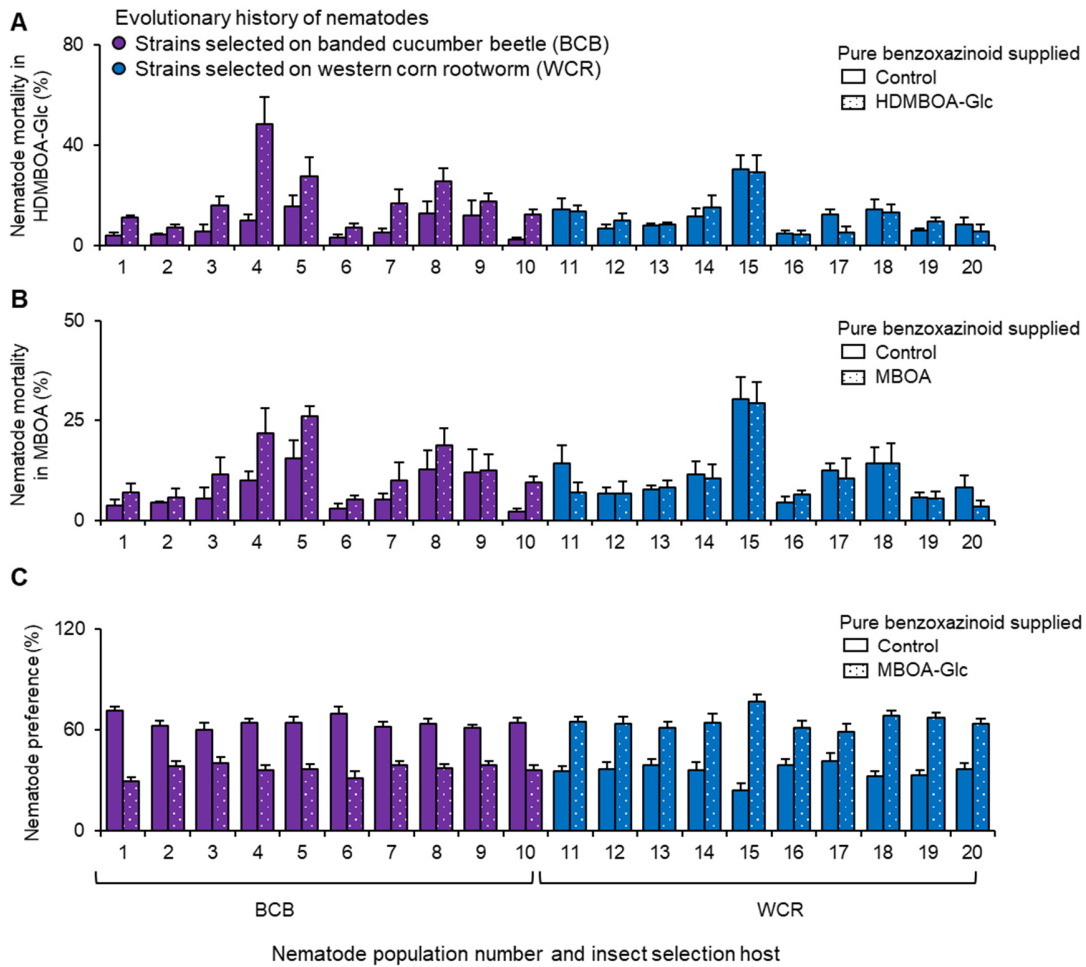

**Fig. S9. Impact of pure benzoxazinoids on individual nematode populations after five generations of artificial selection. (A)** Mortality of individual nematode strains after five generations of selection on the western corn rootworm (WCR; blue) or the banded cucumber beetle (BCB; purple) treated with water (plain filled bars) or 150  $\mu\text{g}/\text{mL}$  HDMBOA-Glc (dotted bars) is shown. **(B)** Mortality of nematodes treated with water or 25  $\mu\text{g}/\text{mL}$  MBOA. **(C)** Preference of nematodes for water or 3  $\mu\text{g}/\text{mL}$  MBOA-Glc.

**Table S1. Source and evolutionary histories of the different nematode strains**

| Strain            | Abbreviation | Potential evolutionary history with WCR (years) | Nematode species        | Country of origin               | Location within country | Source                              |
|-------------------|--------------|-------------------------------------------------|-------------------------|---------------------------------|-------------------------|-------------------------------------|
| Boj (Hbz 90,2,24) | BOJ          | 0                                               | <i>H. bacteriophora</i> | Iran                            | Bojnourd                | Kamali Shokoofeh, 2014 <sup>1</sup> |
| HU 2              | HU2          | 0*                                              |                         | Hungary                         | N.a.                    | e-nema GmbH                         |
| IR 2              | IR2          | 0                                               |                         | Iran                            | N.a.                    | e-nema GmbH                         |
| DE 2              | DE2          | 0*                                              |                         | Germany                         | N.a.                    | e-nema GmbH                         |
| DE 6              | DE6          | 0*                                              |                         | Germany                         | N.a.                    | e-nema GmbH                         |
| EN 01             | EN01         | 0**                                             |                         | Commercial                      | N.a.                    | e-nema GmbH                         |
| IL 9              | IL9          | 0                                               |                         | Australia                       | N.a.                    | e-nema GmbH                         |
| IT 6              | IT6          | 0*                                              |                         | Italy                           | N.a.                    | e-nema GmbH                         |
| MG 618b           | MG           | 0                                               |                         | Switzerland                     | Le Cerneux-Péquignot    | Raquel Campos-Herrera               |
| RW14-N-C4a        | RW14         | 0                                               |                         | Rwanda                          | Nyamagabe               | X. Yan, 2016 <sup>2</sup>           |
| M13e              | TT01         | 0                                               |                         | Republic of Trinidad and Tobago | N.a.                    | P. Constant, 1998 <sup>3</sup>      |
| Hb 17             | HB17         | 0                                               |                         | Turkey                          | Kirklareli              | T.C. Ulu, 2014 <sup>4</sup>         |
| PT 1              | PT1          | 0                                               |                         | Portugal                        | N.a.                    | e-nema GmbH                         |
| 09-43             | S0943        | 0                                               |                         | Turkey                          | Aydin                   | I. Kepenekci, 2013 <sup>5</sup>     |
| S12               | S12          | 52***                                           |                         | USA                             | Minnesota               | Own collection                      |
| S14               | S14          | 62***                                           | USA                     | Kansas                          | Own collection          |                                     |
| S15               | S15          | 62***                                           | USA                     | Kansas                          | Own collection          |                                     |
| S5P8              | S5           | 52***                                           | USA                     | Illinois                        | Own collection          |                                     |
| S7                | S7           | 52***                                           | USA                     | Iowa                            | Own collection          |                                     |
| CN 4              | CN4          | 0                                               | <i>H. beicherriana</i>  | China                           | N.a.                    | e-nema GmbH                         |
| H06               | HO6          | 0                                               |                         | China                           | Shandong                | R.C. Han, 1996 <sup>6</sup>         |
| LJ-24             | LJ24         | 0                                               |                         | China                           | Liaoning                | J. Ma, 2013 <sup>7</sup>            |

|     |     |    |                     |     |                 |                   |
|-----|-----|----|---------------------|-----|-----------------|-------------------|
| S10 | S10 | 62 |                     | USA | South<br>Dakota | Own<br>collection |
| S8  | S8  | 62 | <i>H. georgiana</i> | USA | Nebraska        | Own<br>collection |
| S9  | S9  | 62 |                     | USA | Nebraska        | Own<br>collection |

*N.a.: Not available*

*\* Nematodes were collected prior to invasion of Europe by the western corn rootworm*

*\*\* Artificially generated strain*

*\*\*\*Nematodes were isolated from maize fields within the primary range of the western corn rootworm*

**Table S2. Numbers of individual biological replicates measured in the different experiments**

| Main figure | Supplementary figure | No. | Nematode strains               | Treatment          | Number of independent replicates per treatment/ nematode strain | Unit for replicate                            |                                     |
|-------------|----------------------|-----|--------------------------------|--------------------|-----------------------------------------------------------------|-----------------------------------------------|-------------------------------------|
| Figure 1B   | Figure S1            |     |                                | BCB/WCR            | 5                                                               | Five herbivores                               |                                     |
| Figure 1C   | Figure S2            |     | All strains                    | BCB                | 7*                                                              | Solo cup containing 3-5 individual herbivores |                                     |
|             |                      |     | LJ24                           | WCR                | 22                                                              |                                               |                                     |
|             |                      |     | Other strains                  |                    | 24                                                              |                                               |                                     |
| Figure 2A   | Figure S3            |     |                                | BX- /BX+           | 5                                                               | Five herbivores                               |                                     |
| Figure 2B   | Figure S4            |     | All strains                    | BX-                | 5*                                                              | Solo cup containing 3-5 individual herbivores |                                     |
|             |                      |     |                                | BX+                | 10                                                              |                                               |                                     |
| Figure 2D   | Figure S6            | A   | All strains                    | Control/HDMBOA-Glc | 10                                                              | Flask containing 4000 nematodes               |                                     |
| Figure 2E   |                      | B   | All strains                    | Control/MBOA       | 10                                                              |                                               |                                     |
| Figure 2F   |                      | C   | Boj                            | Other strains      | MBOA-Glc                                                        | 19                                            | Petri dish containing 100 nematodes |
|             |                      |     | HU 2                           |                    |                                                                 | 18                                            |                                     |
|             |                      |     | Other strains                  |                    |                                                                 | 20                                            |                                     |
| Figure 3A   | Figure S7            |     | All lines                      | BX- /BX+           | 10                                                              | Solo cup containing 3-5 individual herbivores |                                     |
| Figure 3B   | Figure S8            |     | Line 17                        | BX-                | 10                                                              |                                               |                                     |
|             |                      |     | Other Lines                    |                    | 9                                                               |                                               |                                     |
|             |                      |     | Line 17                        | BX+                | 10                                                              |                                               |                                     |
|             |                      |     | Line 1, 2, 6, 8, 9, 11, 13, 19 |                    | 11                                                              |                                               |                                     |
|             |                      |     | Other Lines                    |                    | 16                                                              |                                               |                                     |
| Figure 3D   | Figure S9            | A   | All lines                      | Control/HDMBOA-Glc | 8                                                               | Flask containing 4000 nematodes               |                                     |
| Figure 3E   |                      | B   | All lines                      | Control/MBOA       | 8                                                               |                                               |                                     |
| Figure 3F   |                      | C   | Line 12, 15, 17, 20            | Other Lines        | MBOA-Glc                                                        | 19                                            | Petri dish containing 100 nematodes |
|             |                      |     | Other Lines                    |                    |                                                                 | 20                                            |                                     |

\* Lower number of replicates are due to the lower availability of BCB and BX- WCR larvae at the time of experiment.

## References

1. S. Kamali, J. Karimi, E. Shokoohi, Survey on entomopathogenic nematodes in families Steinernematidae and Heterorhabditidae in North Khorasan. *Bio. Control Pests Plant Dis.* **2**, 107-121 (2014).
2. X. Yan, B. Waweru, X. Qiu, A. Hategekimana, J. Kajuga, H. Li, S. Edgington, C. Umulisa, R. Han, S. Toepfer, New entomopathogenic nematodes from semi-natural and small-holder farming habitats of Rwanda. *Biocontrol Sci. Technol.* **26**, 820-834 (2016).
3. P. Constant, L. Marchay, M. Fischer-Le-Saux, S. Briand-Panoma, H. Mauleon, Natural occurrence of entomopathogenic nematodes (Rhabditida: Steinernematidae and Heterorhabditidae) in Guadeloupe islands. *Fundam. Appl. Nematol.* **21**, 667–672 (1998).
4. T. C. Ulu, I. A. Susurluk, Heat and desiccation tolerances of *Heterorhabditis bacteriophora* strains and relationships between their tolerances and some bioecological characteristics. *Invertebrate Surviv. J.* **11**, 4–10 (2013).
5. I. Kepenekci, A. Tulek, M. Alkan, S. Hazir, Biological control potential of native entomopathogenic nematodes against the potato tuber moth, *Phthorimaea operculella* (Zeller) (Lepidoptera: Gelechiidae) in Turkey. *Pakistan J. Zool.* **45**, 1415–1422 (2013).
6. R. C. Han, The effects of inoculum size on yield of *Steinernema carpocapsae* and *Heterorhabditis bacteriophora* in liquid culture. *Nematologica* **42**, 546–553 (1996).
7. J. Ma, S. Chen, M. Moens, P. Clercq, X. Li, R. Han, Characterization in biological traits of entomopathogenic nematodes isolated from North China. *J. Invertebr. Pathol.* **114**, 268–276 (2013).
