# Supplementary material for: Plant defense resistance in natural enemies of a specialist insect herbivore
Source: PubMed Central journal article supplement — Proc Natl Acad Sci U S A. 2019 Oct 28;116(46):23174–81. doi: 10.1073/pnas.1912599116 (PMC6859362; doi:10.1073/pnas.1912599116), 2019-10-28
Supplement: pnas.1912599116.sd01.pdf [file pnas.1912599116.sd01.pdf]

# Plant defense resistance in natural enemies of a specialist insect herbivore

Zhang *et al.*

09/09/2019

## Contents

|                           |          |
|---------------------------|----------|
| <b>Figure 1</b>           | <b>1</b> |
| Figure 1B . . . . .       | 1        |
| Figure 1C . . . . .       | 2        |
| <b>Figure 2</b>           | <b>3</b> |
| Figure 2A . . . . .       | 3        |
| Figure 2B . . . . .       | 3        |
| Figure 2D . . . . .       | 4        |
| Figure 2E . . . . .       | 4        |
| Figure 2F . . . . .       | 5        |
| Deltas . . . . .          | 6        |
| Figure 2G . . . . .       | 6        |
| Figure 2H . . . . .       | 7        |
| Figure 2I . . . . .       | 7        |
| Model selection . . . . . | 7        |
| <b>Figure 3</b>           | <b>8</b> |
| Figure 3A . . . . .       | 8        |
| Figure 3B . . . . .       | 9        |
| Figure 3C . . . . .       | 10       |
| Figure 3D . . . . .       | 10       |
| Figure 3E . . . . .       | 11       |
| Figure 3F . . . . .       | 11       |
| Figure 3G . . . . .       | 12       |
| Figure 3H . . . . .       | 12       |
| Deltas . . . . .          | 13       |
| Model selection . . . . . | 13       |

```
library(lme4)
library(car)
library(emmeans)
library(multcomp)
library(RVAideMemoire)
library(MuMIn)
library(stats)
```

## Figure 1

### Figure 1B

```
tab.1B <- read.table("Fig1B.txt",header=TRUE)
with(tab.1B, t.test(MBOA.Glc[larvae=="BCB"],MBOA.Glc[larvae=="WCR"],var.equal=TRUE))
```

### Two Sample t-test

```
data: MBOA.Glc[larvae == "BCB"] and MBOA.Glc[larvae == "WCR"]
t = -4.3402, df = 8, p-value = 0.002478
alternative hypothesis: true difference in means is not equal to 0
95 percent confidence interval:
 -45.36581 -13.88507
sample estimates:
mean of x mean of y
 2.85099 32.47643
```

```
with(tab.1B, t.test(HDMBOA.Glc[larvae=="BCB"],MBOA.Glc[larvae=="WCR"],var.equal=TRUE))
```

### Two Sample t-test

```
data: HDMBOA.Glc[larvae == "BCB"] and MBOA.Glc[larvae == "WCR"]
t = -4.5213, df = 8, p-value = 0.001947
alternative hypothesis: true difference in means is not equal to 0
95 percent confidence interval:
 -46.41587 -15.06090
sample estimates:
mean of x mean of y
 1.738045 32.476431
```

## Figure 1C

```
tab.1C <- read.table("Fig1C.txt",header=TRUE)
mod.1C <- glm(cbind(dead,alive)~origin*larvae+(1|origin:strain),family=binomial,
             data=tab.1C)
Anova(mod.1C)
```

Analysis of Deviance Table (Type II Wald chisquare tests)

```
Response: cbind(dead, alive)
             Chisq Df Pr(>Chisq)
origin      11.125  1 0.0008516 ***
larvae      41.825  1 9.982e-11 ***
origin:larvae 18.972  1 1.327e-05 ***
---
```

Signif. codes: 0 '\*\*\*' 0.001 '\*\*' 0.01 '\*' 0.05 '.' 0.1 ' ' 1

```
cld(emmeans(mod.1C,~origin:larvae,type="response"),adjust="fdr")
```

| origin | larvae | prob      | SE         | df  | asympt.LCL | asympt.UCL | .group |
|--------|--------|-----------|------------|-----|------------|------------|--------|
| WCR-   | WCR    | 0.2402075 | 0.03378813 | Inf | 0.1660411  | 0.3342254  | 1      |
| WCR-   | BCB    | 0.4744115 | 0.05180587 | Inf | 0.3494663  | 0.6026452  | 2      |
| WCR+   | WCR    | 0.5311696 | 0.06567572 | Inf | 0.3696138  | 0.6864457  | 2      |
| WCR+   | BCB    | 0.5448768 | 0.07451161 | Inf | 0.3611247  | 0.7171706  | 2      |

Confidence level used: 0.95

Conf-level adjustment: bonferroni method for 4 estimates

Intervals are back-transformed from the logit scale

P value adjustment: fdr method for 6 tests

Tests are performed on the log odds ratio scale  
significance level used: alpha = 0.05

## Figure 2

### Figure 2A

```
tab.2A <- read.table("Fig2A.txt",header=TRUE)
with(tab.2A, t.test(MBOA.Glc[larvae=="B73"],MBOA.Glc[larvae=="BX1"],var.equal=TRUE))
```

Two Sample t-test

```
data: MBOA.Glc[larvae == "B73"] and MBOA.Glc[larvae == "BX1"]
t = 6.9441, df = 8, p-value = 0.0001191
alternative hypothesis: true difference in means is not equal to 0
95 percent confidence interval:
 14.06841 28.05768
sample estimates:
mean of x mean of y
27.134014  6.070968
```

```
with(tab.2A, t.test(HDMBOA.Glc[larvae=="B73"],MBOA.Glc[larvae=="BX1"],var.equal=TRUE))
```

Two Sample t-test

```
data: HDMBOA.Glc[larvae == "B73"] and MBOA.Glc[larvae == "BX1"]
t = 15.532, df = 8, p-value = 2.94e-07
alternative hypothesis: true difference in means is not equal to 0
95 percent confidence interval:
 304.0213 410.0354
sample estimates:
mean of x mean of y
363.099332  6.070968
```

### Figure 2B

```
tab.2B <- read.table("Fig2B.txt",header=TRUE)
mod.2B <- glmer(cbind(dead,alive)~origin*larvae+(1|origin:strain),family=binomial,data=tab.2B)
Anova(mod.2B)
```

Analysis of Deviance Table (Type II Wald chisquare tests)

```
Response: cbind(dead, alive)
              Chisq Df Pr(>Chisq)
origin        24.7915  1 6.388e-07 ***
larvae        30.3407  1 3.624e-08 ***
origin:larvae  7.5457  1 0.006015 **
---
```

Signif. codes: 0 '\*\*\*' 0.001 '\*\*' 0.01 '\*' 0.05 '.' 0.1 ' ' 1

```
cld(emmeans(mod.2B,~origin:larvae,type="response"),adjust="fdr")
```

```
origin larvae      prob          SE df asymp.LCL asymp.UCL .group
```

|      |     |           |            |     |           |           |   |
|------|-----|-----------|------------|-----|-----------|-----------|---|
| WCR- | BX+ | 0.3208637 | 0.02885345 | Inf | 0.2534064 | 0.3967358 | 1 |
| WCR- | BX- | 0.5522952 | 0.03850239 | Inf | 0.4553749 | 0.6453986 | 2 |
| WCR+ | BX+ | 0.6359723 | 0.04372018 | Inf | 0.5215471 | 0.7368399 | 2 |
| WCR+ | BX- | 0.6777277 | 0.05155519 | Inf | 0.5383691 | 0.7913230 | 2 |

Confidence level used: 0.95  
 Conf-level adjustment: bonferroni method for 4 estimates  
 Intervals are back-transformed from the logit scale  
 P value adjustment: fdr method for 6 tests  
 Tests are performed on the log odds ratio scale  
 significance level used: alpha = 0.05

## Figure 2D

```
tab.2D <- read.table("Fig2D.txt",header=TRUE)
tab.2D$ind <- factor(1:nrow(tab.2D))
mod.2D <- glmer(cbind(dead,alive)~origin*treatment+(1|origin:strain)+(1|ind),
               family=binomial,data=tab.2D)
Anova(mod.2D)
```

Analysis of Deviance Table (Type II Wald chisquare tests)

Response: cbind(dead, alive)

|                  | Chisq  | Df | Pr(>Chisq) |
|------------------|--------|----|------------|
| origin           | 2.3181 | 1  | 0.12788    |
| treatment        | 5.9105 | 1  | 0.01505 *  |
| origin:treatment | 1.4040 | 1  | 0.23606    |

---  
 Signif. codes: 0 '\*\*\*' 0.001 '\*\*' 0.01 '\*' 0.05 '.' 0.1 ' ' 1

```
cld(emmeans(mod.2D,~origin:treatment,type="response"),adjust="fdr")
```

| origin | treatment | prob       | SE         | df  | asyp.LCL   | asyp.UCL  | .group |
|--------|-----------|------------|------------|-----|------------|-----------|--------|
| WCR+   | CON       | 0.04587901 | 0.01716471 | Inf | 0.01773741 | 0.1135096 | 12     |
| WCR+   | HDG       | 0.05358120 | 0.01991302 | Inf | 0.02078964 | 0.1311667 | 12     |
| WCR-   | CON       | 0.06475794 | 0.01736137 | Inf | 0.03273142 | 0.1241008 | 1      |
| WCR-   | HDG       | 0.12433673 | 0.03080158 | Inf | 0.06546125 | 0.2235006 | 2      |

Confidence level used: 0.95  
 Conf-level adjustment: bonferroni method for 4 estimates  
 Intervals are back-transformed from the logit scale  
 P value adjustment: fdr method for 6 tests  
 Tests are performed on the log odds ratio scale  
 significance level used: alpha = 0.05

## Figure 2E

```
tab.2E <- read.table("Fig2E.txt",header=TRUE)
tab.2E$ind <- factor(1:nrow(tab.2E))
mod.2E <- glmer(cbind(dead,alive)~origin*treatment+(1|origin:strain)+(1|ind),
               family=binomial,data=tab.2E)
Anova(mod.2E)
```

Analysis of Deviance Table (Type II Wald chisquare tests)

```

Response: cbind(dead, alive)
              Chisq Df Pr(>Chisq)
origin        2.3212  1   0.12763
treatment     5.0581  1   0.02451 *
origin:treatment 0.9744  1   0.32357
---
Signif. codes:  0 '***' 0.001 '**' 0.01 '*' 0.05 '.' 0.1 ' ' 1

cld(emmeans(mod.2E,~origin:treatment,type="response"),adjust="fdr")

```

| origin | treatment | prob       | SE         | df  | asyp.LCL   | asyp.UCL  | .group |
|--------|-----------|------------|------------|-----|------------|-----------|--------|
| WCR+   | CON       | 0.04736612 | 0.01615564 | Inf | 0.01992607 | 0.1084137 | 1      |
| WCR+   | M         | 0.05598840 | 0.01874183 | Inf | 0.02387693 | 0.1257235 | 1      |
| WCR-   | CON       | 0.06619384 | 0.01611620 | Inf | 0.03564315 | 0.1196806 | 1      |
| WCR-   | M         | 0.11573834 | 0.02620727 | Inf | 0.06458453 | 0.1987976 | 1      |

Confidence level used: 0.95  
Conf-level adjustment: bonferroni method for 4 estimates  
Intervals are back-transformed from the logit scale  
P value adjustment: fdr method for 6 tests  
Tests are performed on the log odds ratio scale  
significance level used: alpha = 0.05

## Figure 2F

```

tab.2F <- read.table("Fig2F.txt",header=TRUE)
with(tab.2F[tab.2F$origin=="WCR-",],wald.ptheo.test(cbind(MG,CON),blocks=strain))

```

Wald test

data: cbind(MG, CON) and strain  
z = -9.4497, p-value < 2.2e-16  
alternative hypothesis: true probability of success is not equal to 0.5  
sample estimates:  
probability of success  
0.4081634

```

with(tab.2F[tab.2F$origin=="WCR+",],wald.ptheo.test(cbind(MG,CON),blocks=strain))

```

Wald test

data: cbind(MG, CON) and strain  
z = 0.70107, p-value = 0.4833  
alternative hypothesis: true probability of success is not equal to 0.5  
sample estimates:  
probability of success  
0.5130041

```

mod.2F <- glmer(cbind(MG,CON)~origin+(1|origin:strain),family=binomial,data=tab.2F)
Anova(mod.2F)

```

Analysis of Deviance Table (Type II Wald chisquare tests)

Response: cbind(MG, CON)

```

      Chisq Df Pr(>Chisq)
origin 56.33  1  6.128e-14 ***
---
Signif. codes:  0 '***' 0.001 '**' 0.01 '*' 0.05 '.' 0.1 ' ' 1

```

## Deltas

```

mod.2B <- glm(cbind(dead,alive)~larvae*strain,family=binomial,data=tab.2B)
means.2B <- as.data.frame(summary(emmeans(mod.2B,~larvae:strain),type="response"))
delta.2B <- apply(with(means.2B,tapply(prob,list(larvae,strain),identity)),2,
                 function(x) x[1]-x[2])

mod.2D <- glm(cbind(dead,alive)~treatment*strain,family=binomial,data=tab.2D)
means.2D <- as.data.frame(summary(emmeans(mod.2D,~treatment:strain),type="response"))
delta.2D <- apply(with(means.2D,tapply(prob,list(treatment,strain),identity)),2,
                 function(x) x[2]-x[1])

mod.2E <- glm(cbind(dead,alive)~treatment*strain,family=binomial,data=tab.2E)
means.2E <- as.data.frame(summary(emmeans(mod.2E,~treatment:strain),type="response"))
delta.2E <- apply(with(means.2E,tapply(prob,list(treatment,strain),identity)),2,
                 function(x) x[2]-x[1])

mod.2F <- glm(cbind(MG,CON)~strain,family=binomial,data=tab.2F)
means.2F <- as.data.frame(summary(emmeans(mod.2F,~strain),type="response"))
delta.2F <- means.2F$prob
names(delta.2F) <- means.2F$strain

```

## Figure 2G

```

tab.2G <- read.table("Fig2G-I.txt",header=TRUE)
mod.2G <- lm(Infectivity~HDGmortality,data=tab.2G)
summary(mod.2G)

```

Call:

```
lm(formula = Infectivity ~ HDGmortality, data = tab.2G)
```

Residuals:

| Min     | 1Q     | Median | 3Q     | Max    |
|---------|--------|--------|--------|--------|
| -24.953 | -9.795 | -4.570 | 15.379 | 33.568 |

Coefficients:

|              | Estimate | Std. Error | t value | Pr(> t )     |
|--------------|----------|------------|---------|--------------|
| (Intercept)  | 15.58304 | 3.80685    | 4.093   | 0.000446 *** |
| HDGmortality | 0.02005  | 0.02986    | 0.671   | 0.508777     |

---

```
Signif. codes:  0 '***' 0.001 '**' 0.01 '*' 0.05 '.' 0.1 ' ' 1
```

Residual standard error: 16.16 on 23 degrees of freedom

Multiple R-squared: 0.01921, Adjusted R-squared: -0.02343

F-statistic: 0.4505 on 1 and 23 DF, p-value: 0.5088

## Figure 2H

```
tab.2H <- read.table("Fig2G-I.txt",header=TRUE)
mod.2H <- lm(Infectivity~Mmortality,data=tab.2H)
summary(mod.2H)
```

Call:

```
lm(formula = Infectivity ~ Mmortality, data = tab.2H)
```

Residuals:

| Min     | 1Q     | Median | 3Q     | Max    |
|---------|--------|--------|--------|--------|
| -24.930 | -9.546 | -3.876 | 11.206 | 34.833 |

Coefficients:

|             | Estimate | Std. Error | t value | Pr(> t )     |
|-------------|----------|------------|---------|--------------|
| (Intercept) | 15.37908 | 3.81556    | 4.031   | 0.000521 *** |
| Mmortality  | 0.02644  | 0.03474    | 0.761   | 0.454349     |

---  
Signif. codes: 0 '\*\*\*' 0.001 '\*\*' 0.01 '\*' 0.05 '.' 0.1 ' ' 1

Residual standard error: 16.12 on 23 degrees of freedom

Multiple R-squared: 0.02457, Adjusted R-squared: -0.01785

F-statistic: 0.5792 on 1 and 23 DF, p-value: 0.4543

## Figure 2I

```
tab.2I <- read.table("Fig2G-I.txt",header=TRUE)
mod.2I <- lm(Infectivity~EPNbehavior,data=tab.2I)
summary(mod.2I)
```

Call:

```
lm(formula = Infectivity ~ EPNbehavior, data = tab.2I)
```

Residuals:

| Min     | 1Q      | Median | 3Q     | Max    |
|---------|---------|--------|--------|--------|
| -22.682 | -11.337 | 0.313  | 10.535 | 33.139 |

Coefficients:

|             | Estimate | Std. Error | t value | Pr(> t )   |
|-------------|----------|------------|---------|------------|
| (Intercept) | 7.5604   | 3.8549     | 1.961   | 0.06207 .  |
| EPNbehavior | 0.8228   | 0.2441     | 3.371   | 0.00264 ** |

---  
Signif. codes: 0 '\*\*\*' 0.001 '\*\*' 0.01 '\*' 0.05 '.' 0.1 ' ' 1

Residual standard error: 13.35 on 23 degrees of freedom

Multiple R-squared: 0.3307, Adjusted R-squared: 0.3016

F-statistic: 11.36 on 1 and 23 DF, p-value: 0.002639

## Model selection

```
fig2.mod.global <- lm(delta.2B~(delta.2D+delta.2E+delta.2F)^2,na.action="na.pass")
dredge(fig2.mod.global,rank="AICc",extra="R^2")
```

```
Global model call: lm(formula = delta.2B ~ (delta.2D + delta.2E + delta.2F)^2, na.action = "na.pass")
```

```
---
```

```
Model selection table
```

|    | (Int)  | dlt.2D | dlt.2E   | dlt.2F | dlt.2D:dlt.2E | dlt.2D:dlt.2F | dlt.2E:dlt.2F |
|----|--------|--------|----------|--------|---------------|---------------|---------------|
| 5  | 0.9104 |        |          | -1.665 |               |               |               |
| 6  | 0.8516 | 0.2576 |          | -1.565 |               |               |               |
| 7  | 0.8838 |        | 0.15610  | -1.619 |               |               |               |
| 22 | 0.7287 | 2.2500 |          | -1.304 |               | -4.424        |               |
| 8  | 0.8596 | 0.4841 | -0.35070 | -1.579 |               |               |               |
| 39 | 0.8472 |        | 1.09100  | -1.539 |               |               | -2.163        |
| 24 | 0.7292 | 2.6540 | -0.40450 | -1.302 |               | -4.741        |               |
| 40 | 0.7166 | 0.7099 | 2.77600  | -1.271 |               |               | -7.783        |
| 16 | 0.8740 | 0.3817 | -0.50610 | -1.606 | 1.8090        |               |               |
| 1  | 0.1666 |        |          |        |               |               |               |
| 2  | 0.1292 | 0.6787 |          |        |               |               |               |
| 3  | 0.1390 |        | 0.69250  |        |               |               |               |
| 4  | 0.1297 | 0.7605 | -0.12450 |        |               |               |               |
| 32 | 0.7401 | 2.5070 | -0.43950 | -1.324 | 0.4429        | -4.474        |               |
| 56 | 0.7354 | 3.0180 | -1.09200 | -1.315 |               | -5.644        | 1.686         |
| 48 | 0.7271 | 0.6781 | 2.57600  | -1.293 | 0.3451        |               | -7.359        |
| 12 | 0.1285 | 0.8138 | -0.04191 |        | -0.9862       |               |               |
| 64 | 0.7538 | 3.0940 | -1.63800 | -1.354 | 0.5698        | -5.958        | 2.915         |

|    | R <sup>2</sup> | df | logLik | AICc  | delta | weight |
|----|----------------|----|--------|-------|-------|--------|
| 5  | 0.37380        | 3  | 17.524 | -27.9 | 0.00  | 0.547  |
| 6  | 0.38530        | 4  | 17.757 | -25.5 | 2.39  | 0.165  |
| 7  | 0.37640        | 4  | 17.576 | -25.2 | 2.75  | 0.138  |
| 22 | 0.39520        | 5  | 17.959 | -22.8 | 5.14  | 0.042  |
| 8  | 0.38960        | 5  | 17.844 | -22.5 | 5.37  | 0.037  |
| 39 | 0.37740        | 5  | 17.596 | -22.0 | 5.87  | 0.029  |
| 24 | 0.40090        | 6  | 18.077 | -19.5 | 8.42  | 0.008  |
| 40 | 0.39930        | 6  | 18.044 | -19.4 | 8.48  | 0.008  |
| 16 | 0.39280        | 6  | 17.911 | -19.2 | 8.75  | 0.007  |
| 1  | 0.00000        | 2  | 11.674 | -18.8 | 9.10  | 0.006  |
| 2  | 0.08964        | 3  | 12.848 | -18.6 | 9.35  | 0.005  |
| 3  | 0.05706        | 3  | 12.408 | -17.7 | 10.23 | 0.003  |
| 4  | 0.09019        | 4  | 12.855 | -15.7 | 12.20 | 0.001  |
| 32 | 0.40100        | 7  | 18.080 | -15.6 | 12.33 | 0.001  |
| 56 | 0.40090        | 7  | 18.078 | -15.6 | 12.34 | 0.001  |
| 48 | 0.39940        | 7  | 18.046 | -15.5 | 12.40 | 0.001  |
| 12 | 0.09117        | 5  | 12.868 | -12.6 | 15.33 | 0.000  |
| 64 | 0.40110        | 8  | 18.082 | -11.2 | 16.74 | 0.000  |

```
Models ranked by AICc(x)
```

## Figure 3

### Figure 3A

```
tab.3A <- read.table("Fig3A.txt",header=TRUE)
mod.3A <- glmer(cbind(dead,alive)~host*larvae+(1|host:line),family=binomial,data=tab.3A)
Anova(mod.3A)
```

```
Analysis of Deviance Table (Type II Wald chisquare tests)
```



```
Response: cbind(dead, alive)
              Chisq Df Pr(>Chisq)
host          0.7190  1    0.3965
larvae       74.6992  1    <2e-16 ***
host:larvae   0.0325  1    0.8569
---
Signif. codes:  0 '***' 0.001 '**' 0.01 '*' 0.05 '.' 0.1 ' ' 1
```

```
cld(emmeans(mod.3A,~host:larvae,type="response"),adjust="fdr")
```

|     | host larvae | prob      | SE         | df  | asympt.LCL | asympt.UCL | .group |
|-----|-------------|-----------|------------|-----|------------|------------|--------|
| WCR | B73         | 0.2515723 | 0.02433272 | Inf | 0.1957560  | 0.3170300  | 1      |
| BCB | B73         | 0.2660550 | 0.02443652 | Inf | 0.2096064  | 0.3313331  | 1      |
| WCR | bx1         | 0.4789644 | 0.02841875 | Inf | 0.4088740  | 0.5498929  | 2      |
| BCB | bx1         | 0.5085714 | 0.02672209 | Inf | 0.4420701  | 0.5747708  | 2      |

Confidence level used: 0.95  
 Conf-level adjustment: bonferroni method for 4 estimates  
 Intervals are back-transformed from the logit scale  
 P value adjustment: fdr method for 6 tests  
 Tests are performed on the log odds ratio scale  
 significance level used: alpha = 0.05

### Figure 3B

```
tab.3B <- read.table("Fig3B.txt",header=TRUE)
mod.3B <- glm(cbind(dead,alive)~host*larvae+(1|host:line),family=binomial,data=tab.3B)
Anova(mod.3B)
```

Analysis of Deviance Table (Type II Wald chisquare tests)

```
Response: cbind(dead, alive)
              Chisq Df Pr(>Chisq)
host          23.5352  1 1.227e-06 ***
larvae         0.0607  1    0.8054
host:larvae   29.5126  1 5.555e-08 ***
---
Signif. codes:  0 '***' 0.001 '**' 0.01 '*' 0.05 '.' 0.1 ' ' 1
```

```
cld(emmeans(mod.3B,~host:larvae,type="response"),adjust="fdr")
```

|     | host larvae | prob      | SE         | df  | asympt.LCL | asympt.UCL | .group |
|-----|-------------|-----------|------------|-----|------------|------------|--------|
| BCB | BX+         | 0.3352399 | 0.03645427 | Inf | 0.2510252  | 0.4314329  | 1      |
| BCB | BX-         | 0.4903373 | 0.04352552 | Inf | 0.3837470  | 0.5978134  | 2      |
| WCR | BX-         | 0.5656125 | 0.04317916 | Inf | 0.4563658  | 0.6688363  | 2      |
| WCR | BX+         | 0.7067292 | 0.03426852 | Inf | 0.6145751  | 0.7845730  | 3      |

Confidence level used: 0.95  
 Conf-level adjustment: bonferroni method for 4 estimates  
 Intervals are back-transformed from the logit scale  
 P value adjustment: fdr method for 6 tests  
 Tests are performed on the log odds ratio scale  
 significance level used: alpha = 0.05

## Figure 3C

```
tab.3C <- read.table("Fig3C.txt",header=TRUE)
mod.3C <- glmer(cbind(dead,alive)~host*treatment+(1|host:line),family=binomial,
               data=tab.3C)
```

```
Anova(mod.3C)
```

Analysis of Deviance Table (Type II Wald chisquare tests)

Response: cbind(dead, alive)

|                | Chisq   | Df | Pr(>Chisq)    |
|----------------|---------|----|---------------|
| host           | 0.0719  | 1  | 0.7887        |
| treatment      | 25.8523 | 1  | 3.686e-07 *** |
| host:treatment | 25.8504 | 1  | 3.689e-07 *** |

---

Signif. codes: 0 '\*\*\*' 0.001 '\*\*' 0.01 '\*' 0.05 '.' 0.1 ' ' 1

```
cld(emmeans(mod.3C,-host:treatment,type="response"),adjust="fdr")
```

| host | treatment | prob      | SE         | df  | asyp.LCL   | asyp.UCL  | .group |
|------|-----------|-----------|------------|-----|------------|-----------|--------|
| BCB  | CON       | 0.0620952 | 0.01327357 | Inf | 0.03611577 | 0.1047321 | 1      |
| WCR  | CON       | 0.0974913 | 0.01882142 | Inf | 0.05954092 | 0.1556278 | 12     |
| WCR  | HDG       | 0.1037234 | 0.01985898 | Inf | 0.06356147 | 0.1647962 | 12     |
| BCB  | HDG       | 0.1539801 | 0.02763673 | Inf | 0.09677303 | 0.2361628 | 2      |

Confidence level used: 0.95

Conf-level adjustment: bonferroni method for 4 estimates

Intervals are back-transformed from the logit scale

P value adjustment: fdr method for 6 tests

Tests are performed on the log odds ratio scale

significance level used: alpha = 0.05

## Figure 3D

```
tab.3D <- read.table("Fig3D.txt",header=TRUE)
mod.3D <- glmer(cbind(dead,alive)~host*treatment+(1|host:line),family=binomial,
               data=tab.3D)
```

```
Anova(mod.3D)
```

Analysis of Deviance Table (Type II Wald chisquare tests)

Response: cbind(dead, alive)

|                | Chisq   | Df | Pr(>Chisq)    |
|----------------|---------|----|---------------|
| host           | 0.1156  | 1  | 0.73384       |
| treatment      | 6.0029  | 1  | 0.01428 *     |
| host:treatment | 17.5740 | 1  | 2.763e-05 *** |

---

Signif. codes: 0 '\*\*\*' 0.001 '\*\*' 0.01 '\*' 0.05 '.' 0.1 ' ' 1

```
cld(emmeans(mod.3D,-host:treatment,type="response"),adjust="fdr")
```

| host | treatment | prob       | SE         | df  | asyp.LCL   | asyp.UCL   | .group |
|------|-----------|------------|------------|-----|------------|------------|--------|
| BCB  | CON       | 0.05956500 | 0.01253571 | Inf | 0.03495136 | 0.09972107 | 1      |
| WCR  | M         | 0.08964486 | 0.01721077 | Inf | 0.05495438 | 0.14292222 | 12     |
| WCR  | CON       | 0.09879677 | 0.01853701 | Inf | 0.06118707 | 0.15569019 | 12     |
| BCB  | M         | 0.11339495 | 0.02124362 | Inf | 0.07015608 | 0.17817645 | 2      |

Confidence level used: 0.95  
Conf-level adjustment: bonferroni method for 4 estimates  
Intervals are back-transformed from the logit scale  
P value adjustment: fdr method for 6 tests  
Tests are performed on the log odds ratio scale  
significance level used: alpha = 0.05

## Figure 3E

```
tab.3E <- read.table("Fig3E.txt",header=TRUE)
with(tab.3E[tab.3E$host=="BCB",],wald.ptheo.test(cbind(MG,CON),blocks=line))
```

Wald test

data: cbind(MG, CON) and line  
z = -13.15, p-value < 2.2e-16  
alternative hypothesis: true probability of success is not equal to 0.5  
sample estimates:  
probability of success  
0.3591139

```
with(tab.3E[tab.3E$host=="WCR",],wald.ptheo.test(cbind(MG,CON),blocks=line))
```

Wald test

data: cbind(MG, CON) and line  
z = 11.003, p-value < 2.2e-16  
alternative hypothesis: true probability of success is not equal to 0.5  
sample estimates:  
probability of success  
0.6437042

```
mod.3E <- glmer(cbind(MG,CON)~host+(1|host:line),family=binomial,data=tab.3E)
Anova(mod.3E)
```

Analysis of Deviance Table (Type II Wald chisquare tests)

Response: cbind(MG, CON)

|      | Chisq  | Df | Pr(>Chisq)    |
|------|--------|----|---------------|
| host | 306.03 | 1  | < 2.2e-16 *** |
| ---  |        |    |               |

Signif. codes: 0 '\*\*\*' 0.001 '\*\*' 0.01 '\*' 0.05 '.' 0.1 ' ' 1

## Figure 3F

```
tab.3F <- read.table("Fig3F-H.txt",header=TRUE)
mod.3F <- lm(Infectivity~HDGmortality,data=tab.3F)
summary(mod.3F)
```

Call:

```
lm(formula = Infectivity ~ HDGmortality, data = tab.3F)
```

Residuals:

|  | Min      | 1Q      | Median  | 3Q     | Max     |
|--|----------|---------|---------|--------|---------|
|  | -19.2249 | -9.0747 | -0.6894 | 8.3050 | 20.9011 |

Coefficients:

|              | Estimate | Std. Error | t value | Pr(> t )  |
|--------------|----------|------------|---------|-----------|
| (Intercept)  | -8.19412 | 3.19966    | -2.561  | 0.0196 *  |
| Hdgmortality | 0.09858  | 0.01945    | 5.069   | 8e-05 *** |

---

Signif. codes: 0 '\*\*\*' 0.001 '\*\*' 0.01 '\*' 0.05 '.' 0.1 ' ' 1

Residual standard error: 11.62 on 18 degrees of freedom

Multiple R-squared: 0.588, Adjusted R-squared: 0.5651

F-statistic: 25.69 on 1 and 18 DF, p-value: 8.001e-05

### Figure 3G

```
tab.3G <- read.table("Fig3F-H.txt",header=TRUE)
mod.3G <- lm(Infectivity~Mmortality,data=tab.3G)
summary(mod.3G)
```

Call:

```
lm(formula = Infectivity ~ Mmortality, data = tab.3G)
```

Residuals:

|  | Min     | 1Q     | Median | 3Q    | Max    |
|--|---------|--------|--------|-------|--------|
|  | -25.943 | -7.945 | 1.055  | 7.679 | 20.932 |

Coefficients:

|             | Estimate | Std. Error | t value | Pr(> t )     |
|-------------|----------|------------|---------|--------------|
| (Intercept) | -5.18014 | 3.25726    | -1.590  | 0.129169     |
| Mmortality  | 0.14697  | 0.03492    | 4.209   | 0.000528 *** |

---

Signif. codes: 0 '\*\*\*' 0.001 '\*\*' 0.01 '\*' 0.05 '.' 0.1 ' ' 1

Residual standard error: 12.86 on 18 degrees of freedom

Multiple R-squared: 0.496, Adjusted R-squared: 0.468

F-statistic: 17.71 on 1 and 18 DF, p-value: 0.0005279

### Figure 3H

```
tab.3H <- read.table("Fig3F-H.txt",header=TRUE)
mod.3H <- lm(Infectivity~EPNbehavior,data=tab.3G)
summary(mod.3H)
```

Call:

```
lm(formula = Infectivity ~ EPNbehavior, data = tab.3G)
```

Residuals:

|  | Min     | 1Q     | Median | 3Q    | Max    |
|--|---------|--------|--------|-------|--------|
|  | -26.837 | -5.246 | 1.426  | 9.226 | 13.704 |

Coefficients:

```
              Estimate Std. Error t value Pr(>|t|)
(Intercept)    1.6517      2.4355   0.678   0.506
EPNbehavior    0.4601      0.0816   5.639 2.38e-05 ***
```

---

Signif. codes: 0 '\*\*\*' 0.001 '\*\*' 0.01 '\*' 0.05 '.' 0.1 ' ' 1

Residual standard error: 10.89 on 18 degrees of freedom

Multiple R-squared: 0.6385, Adjusted R-squared: 0.6184

F-statistic: 31.79 on 1 and 18 DF, p-value: 2.382e-05

## Deltas

```
mod.3B <- glm(cbind(dead,alive)~larvae*line,family=binomial,data=tab.3B)
means.3B <- as.data.frame(summary(emmeans(mod.3B,~larvae:line),type="response"))
delta.3B <- apply(with(means.3B,tapply(prob,list(larvae,line),identity)),2,
                 function(x) x[1]-x[2])

mod.3C <- glm(cbind(dead,alive)~treatment*line,family=binomial,data=tab.3C)
means.3C <- as.data.frame(summary(emmeans(mod.3C,~treatment:line),type="response"))
delta.3C <- apply(with(means.3C,tapply(prob,list(treatment,line),identity)),2,
                 function(x) x[2]-x[1])

mod.3D <- glm(cbind(dead,alive)~treatment*line,family=binomial,data=tab.3D)
means.3D <- as.data.frame(summary(emmeans(mod.3D,~treatment:line),type="response"))
delta.3D <- apply(with(means.3D,tapply(prob,list(treatment,line),identity)),2,
                 function(x) x[2]-x[1])

mod.3E <- glm(cbind(MG,CON)~line,family=binomial,data=tab.3E)
means.3E <- as.data.frame(summary(emmeans(mod.3E,~line),type="response"))
delta.3E <- means.3E$prob
names(delta.3E) <- means.3E$line
```

## Model selection

```
fig3.mod.global <- lm(delta.3B~(delta.3C+delta.3D+delta.3E)^2,na.action="na.pass")
fig3.mod.selection <- dredge(fig3.mod.global,rank="AICc",extra="R^2")
fig3.mod.selection
```

Global model call: `lm(formula = delta.3B ~ (delta.3C + delta.3D + delta.3E)^2, na.action = "na.pass")`

---

Model selection table

|    | (Int)   | dlt.3C  | dlt.3D   | dlt.3E  | dlt.3C:dlt.3D | dlt.3C:dlt.3E |
|----|---------|---------|----------|---------|---------------|---------------|
| 5  | 0.50470 |         |          | -0.9829 |               |               |
| 6  | 0.37790 | 0.5779  |          | -0.7916 |               |               |
| 7  | 0.51610 |         | -0.08335 | -1.0020 |               |               |
| 22 | 0.43420 | -0.9180 |          | -0.8919 |               | 3.667         |
| 8  | 0.43950 | 0.7312  | -0.69660 | -0.8986 |               |               |
| 39 | 0.47920 |         | 3.05800  | -0.9691 |               |               |
| 24 | 0.51540 | -0.9218 | -0.83820 | -1.0330 |               | 4.129         |
| 56 | 0.53100 | -2.5480 | 4.75600  | -1.1140 |               | 7.893         |
| 40 | 0.41430 | 0.6749  | 1.99500  | -0.8790 |               |               |

|    |          |         |          |         |         |        |  |
|----|----------|---------|----------|---------|---------|--------|--|
| 48 | 0.21880  | 2.1750  | 9.35900  | -0.6022 | -29.360 |        |  |
| 16 | 0.41440  | 1.0180  | -0.40470 | -0.8569 | -5.205  |        |  |
| 2  | -0.07151 | 1.5620  |          |         |         |        |  |
| 32 | 0.78070  | -5.4180 | -2.53600 | -1.4890 | 25.560  | 11.840 |  |
| 4  | -0.07278 | 1.1440  | 1.01700  |         |         |        |  |
| 64 | 0.40830  | -0.7744 | 6.81700  | -0.9156 | -12.150 | 5.070  |  |
| 3  | -0.04307 |         | 2.37200  |         |         |        |  |
| 12 | -0.07709 | 1.9690  | 1.67000  |         | -16.010 |        |  |
| 1  | 0.01202  |         |          |         |         |        |  |

|    | dlt.3D:dlt.3E | R <sup>2</sup> | df | logLik | AICc  | delta | weight |
|----|---------------|----------------|----|--------|-------|-------|--------|
| 5  |               | 0.6498         | 3  | 17.258 | -27.0 | 0.00  | 0.423  |
| 6  |               | 0.6850         | 4  | 18.317 | -26.0 | 1.05  | 0.251  |
| 7  |               | 0.6500         | 4  | 17.263 | -23.9 | 3.16  | 0.087  |
| 22 |               | 0.7039         | 5  | 18.935 | -23.6 | 3.43  | 0.076  |
| 8  |               | 0.6959         | 5  | 18.670 | -23.1 | 3.96  | 0.058  |
| 39 | -7.371        | 0.6745         | 5  | 17.989 | -21.7 | 5.32  | 0.030  |
| 24 |               | 0.7194         | 6  | 19.474 | -20.5 | 6.53  | 0.016  |
| 56 | -13.190       | 0.7771         | 7  | 21.778 | -20.2 | 6.79  | 0.014  |
| 40 | -6.204        | 0.7130         | 6  | 19.249 | -20.0 | 6.98  | 0.013  |
| 48 | -19.380       | 0.7737         | 7  | 21.626 | -19.9 | 7.10  | 0.012  |
| 16 |               | 0.7003         | 6  | 18.814 | -19.2 | 7.85  | 0.008  |
| 2  |               | 0.4369         | 3  | 12.508 | -17.5 | 9.50  | 0.004  |
| 32 |               | 0.7420         | 7  | 20.313 | -17.3 | 9.72  | 0.003  |
| 4  |               | 0.4698         | 4  | 13.111 | -15.6 | 11.46 | 0.001  |
| 64 | -16.150       | 0.7793         | 8  | 21.877 | -14.7 | 12.35 | 0.001  |
| 3  |               | 0.3496         | 3  | 11.067 | -14.6 | 12.38 | 0.001  |
| 12 |               | 0.5155         | 5  | 14.011 | -13.7 | 13.28 | 0.001  |
| 1  |               | 0.0000         | 2  | 6.766  | -8.8  | 18.19 | 0.000  |

Models ranked by AICc(x)

```
fig3.mod.averaging <- model.avg(fig3.mod.selection,subset=(delta<=2),fit=TRUE)
summary(fig3.mod.averaging)
```

Call:

```
model.avg(object = get.models(object = fig3.mod.selection, subset = (delta <=
2)))
```

Component model call:

```
lm(formula = delta.3B ~ <2 unique rhs>, na.action = na.pass)
```

Component models:

|    | df | logLik | AICc   | delta | weight |
|----|----|--------|--------|-------|--------|
| 2  | 3  | 17.26  | -27.02 | 0.00  | 0.63   |
| 12 | 4  | 18.32  | -25.97 | 1.05  | 0.37   |

Term codes:

| delta.3C | delta.3E |
|----------|----------|
| 1        | 2        |

Model-averaged coefficients:

(full average)

|             | Estimate | Std. Error | Adjusted SE | z value | Pr(> z )     |
|-------------|----------|------------|-------------|---------|--------------|
| (Intercept) | 0.4576   | 0.1209     | 0.1276      | 3.586   | 0.000336 *** |
| delta.3E    | -0.9118  | 0.2100     | 0.2227      | 4.094   | 4.23e-05 *** |

delta.3C      0.2149      0.3787      0.3921      0.548 0.583719

(conditional average)

|             | Estimate | Std. Error | Adjusted SE | z value | Pr(> z ) |     |
|-------------|----------|------------|-------------|---------|----------|-----|
| (Intercept) | 0.4576   | 0.1209     | 0.1276      | 3.586   | 0.000336 | *** |
| delta.3E    | -0.9118  | 0.2100     | 0.2227      | 4.094   | 4.23e-05 | *** |
| delta.3C    | 0.5779   | 0.4193     | 0.4514      | 1.280   | 0.200486 |     |

---

Signif. codes: 0 '\*\*\*' 0.001 '\*\*' 0.01 '\*' 0.05 '.' 0.1 ' ' 1

Relative variable importance:

|                      | delta.3E | delta.3C |
|----------------------|----------|----------|
| Importance:          | 1.00     | 0.37     |
| N containing models: | 2        | 1        |
